# Supplementary material for: Risk of Intracranial Hemorrhage Associated With Direct Oral Anticoagulation vs Antiplatelet Therapy: A Systematic Review and Meta-Analysis
Source: PubMed Central journal article supplement (PMC11618459; doi:10.1001/jamanetworkopen.2024.49017), 2024-12-04
Supplement: jamanetwopen-e2449017-s001.pdf [file jamanetwopen-e2449017-s001.pdf]

## Supplemental Online Content

Coyle M, Lynch A, Higgins M, et al. Risk of intracranial hemorrhage associated with direct oral anticoagulation vs antiplatelet therapy: a systematic review and meta-analysis. *JAMA Netw Open*. 2024;7(12):e2449017.  
doi:10.1001/jamanetworkopen.2024.49017

**eAppendix.** Search strategy

**eTable 1.** Reported outcomes of individual trials

**eTable 2.** Definition of major haemorrhage of individual trials

**eFigure 1.** Funnel plot

**eFigure 2.** PRISMA flow diagram

**eFigure 3.** Risk of bias 2 assessment

**eFigure 4.** Association of DOAC compared to antiplatelet therapy with ISTH defined major haemorrhage

**eFigure 5.** Association of DOAC compared to antiplatelet therapy with GI haemorrhage

**eFigure 6.** Association of DOAC compared to antiplatelet therapy with all haemorrhage

**eFigure 7.** Association of DOAC compared to antiplatelet therapy with ischaemic stroke

**eFigure 8.** Association of DOAC compared to antiplatelet therapy with CV death

**eFigure 9.** Association of DOAC compared to antiplatelet therapy with intracranial haemorrhage, sensitivity analysis excluding trials with zero events

This supplemental material has been provided by the authors to give readers additional information about their work.

## **eAppendix. Search strategy**

Studies were searched through February 7<sup>th</sup> 2024.

Search terms were as follows:

Rivaroxaban *OR* Edoxaban *OR* Apixaban *OR* Dabigatran

AND

Aspirin *OR* Clopidogrel *OR* Triflusal *OR* Ticagrelor *OR* Prasugrel *OR* Dipyridamole *OR* Cilostazol

AND

Randomized controlled trial *OR* Randomized controlled trial *OR* Controlled clinical trial *OR* Randomized *OR* Randomized *OR* placebo *OR* Drug therapy *OR* Randomly *OR* Trial *OR* Groups

NOT

Animals *NOT* Humans

The search was conducted through Pubmed and EMBASE.

**eTable 1. Reported outcomes of individual trials**

| Trial                                                                                           | Outcome                  |                   |                   |                              |                 |                  |                          |
|-------------------------------------------------------------------------------------------------|--------------------------|-------------------|-------------------|------------------------------|-----------------|------------------|--------------------------|
|                                                                                                 | Intracranial haemorrhage | Major haemorrhage | Fatal haemorrhage | Gastrointestinal haemorrhage | All haemorrhage | Ischaemic stroke | Cardiovascular mortality |
| ATTICUS 2023                                                                                    | √                        | √                 | √                 | √                            | √               | √                | √                        |
| ARCADIA 2024                                                                                    | √                        | √                 |                   |                              |                 | √                |                          |
| ARTESIA 2023                                                                                    | √                        | √                 | √                 | √                            |                 | √                | √                        |
| DATAS II 2020*                                                                                  |                          | √                 | √                 |                              | √               | √                | √                        |
| RE-SPECT ESUS 2019                                                                              | √                        | √                 | √                 | √                            | √               | √                | √                        |
| NAVIGATE ESUS 2018                                                                              | √                        | √                 | √                 | √                            | √               | √                | √                        |
| EINSTEIN CHOICE 2017                                                                            | √                        | √                 | √                 | √                            | √               | √                |                          |
| COMPASS 2017                                                                                    | √                        | √                 | √                 | √                            | √               | √                | √                        |
| AVERROES 2011                                                                                   | √                        | √                 | √                 | √                            | √               | √                | √                        |
| *Symptomatic haemorrhagic transformation was not considered as primary intracranial haemorrhage |                          |                   |                   |                              |                 |                  |                          |

**eTable 2. Definition of major haemorrhage of individual trials**

| <b>Trial</b>                                                                                                                                                                                                                                                                                                                                                                                                                                     | <b>Major haemorrhage definition</b>                                                                                                                                                                                                                                                                                                                                                                 |
|--------------------------------------------------------------------------------------------------------------------------------------------------------------------------------------------------------------------------------------------------------------------------------------------------------------------------------------------------------------------------------------------------------------------------------------------------|-----------------------------------------------------------------------------------------------------------------------------------------------------------------------------------------------------------------------------------------------------------------------------------------------------------------------------------------------------------------------------------------------------|
| ATTICUS 2023                                                                                                                                                                                                                                                                                                                                                                                                                                     | ISTH definition for major bleeding*                                                                                                                                                                                                                                                                                                                                                                 |
| ARCADIA 2024                                                                                                                                                                                                                                                                                                                                                                                                                                     | Clinically overt bleeding accompanied by a 2-g/dL or greater decrease in the hemoglobin level during a 24-hour period, transfusion of 2 units or more of whole blood or red blood cells, involvement of a critical non-intracranial site (intraspinal, intraocular, pericardial, intra-articular, intramuscular with compartment syndrome, or retroperitoneal), or death.                           |
| ARTESIA 2023                                                                                                                                                                                                                                                                                                                                                                                                                                     | ISTH definition for major bleeding*                                                                                                                                                                                                                                                                                                                                                                 |
| DATAS II 2020                                                                                                                                                                                                                                                                                                                                                                                                                                    | Definition not reported                                                                                                                                                                                                                                                                                                                                                                             |
| RE-SPECT ESUS 2019                                                                                                                                                                                                                                                                                                                                                                                                                               | ISTH definition for major bleeding*                                                                                                                                                                                                                                                                                                                                                                 |
| NAVIGATE ESUS 2018                                                                                                                                                                                                                                                                                                                                                                                                                               | ISTH definition for major bleeding*                                                                                                                                                                                                                                                                                                                                                                 |
| EINSTEIN CHOICE 2017                                                                                                                                                                                                                                                                                                                                                                                                                             | ISTH definition for major bleeding*                                                                                                                                                                                                                                                                                                                                                                 |
| COMPASS 2017                                                                                                                                                                                                                                                                                                                                                                                                                                     | All bleeding leading to presentation to an acute care facility or hospital                                                                                                                                                                                                                                                                                                                          |
| AVERROES 2011                                                                                                                                                                                                                                                                                                                                                                                                                                    | Clinically overt bleeding accompanied by one or more of the following: a decrease in the hemoglobin level of 2 g per deciliter or more over a 24-hour period, transfusion of 2 or more units of packed red cells, bleeding at a critical site (intracranial, intraspinal, intraocular, pericardial, intraarticular, intramuscular with compartment syndrome, or retroperitoneal), or fatal bleeding |
| *ISTH definition = Fatal bleeding and/or symptomatic bleeding in a critical area or organ, such as intracranial, intraspinal, intraocular, retroperitoneal, intra-articular or pericardial, or intramuscular with compartment syndrome, and/or bleeding causing a fall in haemoglobin level of 20 gL <sup>-1</sup> (1.24 mmolL <sup>-1</sup> ) or more, or leading to transfusion of two or more units of whole blood or red cells <sup>15</sup> |                                                                                                                                                                                                                                                                                                                                                                                                     |

**eFigure 1. Funnel plot**

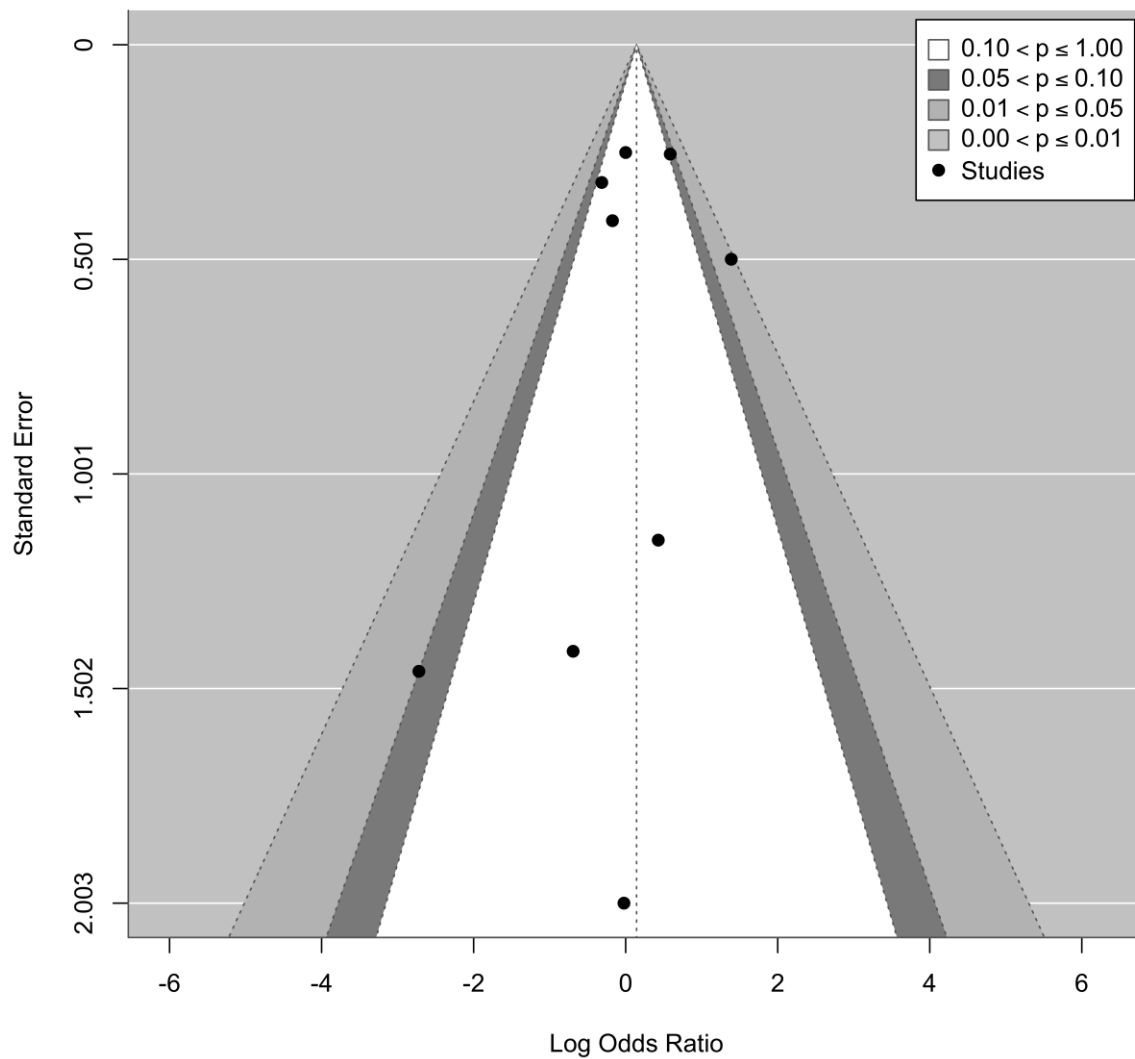

eFigure 1 – Contour enhanced funnel plot for the primary outcome; intracranial haemorrhage. Different levels of statistical significance for studies are indicated by the shaded regions, detailed within the figure. The grey vertical line represents the summary estimate for the association of DOAC therapy compared to antiplatelet therapy with intracranial haemorrhage outcome.

**eFigure 2. PRISMA flow diagram**

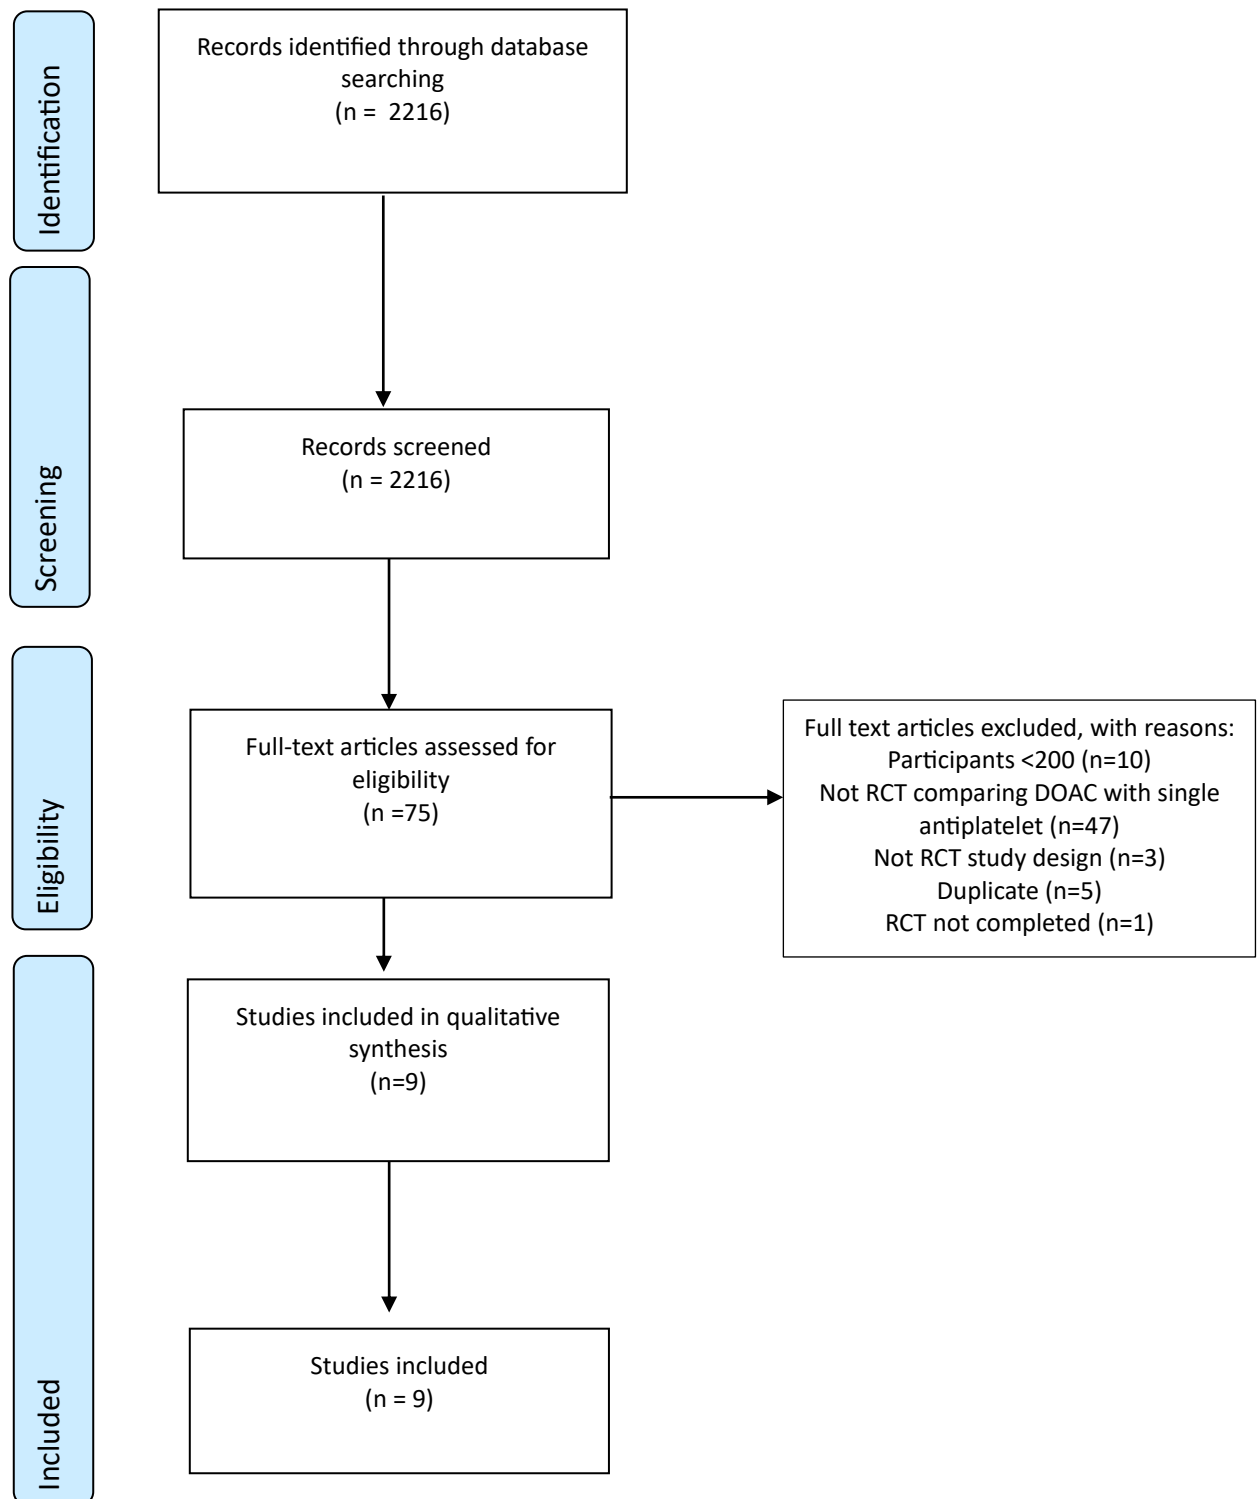

### eFigure 3. Risk of bias 2 assessment

| <u>StudyID</u>  | <u>Experimental</u> | <u>Comparator</u> | <u>D1</u> | <u>D2</u> | <u>D3</u> | <u>D4</u> | <u>D5</u> | <u>Overall</u> |   |
|-----------------|---------------------|-------------------|-----------|-----------|-----------|-----------|-----------|----------------|---|
| NAVIGATE ESUS   | Rivaroxaban         | Aspirin           | +         | +         | +         | +         | +         | +              | + |
| RESPECT ESUS    | Dabigatran          | Aspirin           | +         | +         | +         | +         | +         | +              | + |
| EINSTEIN CHOICE | Rivaroxaban         | Aspirin           | +         | +         | +         | +         | +         | +              | + |
| DATAS II        | Dabigatran          | Aspirin           | +         | !         | +         | +         | +         | +              | + |
| AVERROES        | Apixaban            | Aspirin           | +         | +         | +         | +         | +         | +              | + |
| ARTESIA         | Apixaban            | Aspirin           | +         | +         | +         | +         | +         | +              | + |
| COMPASS         | Rivaroxaban         | Aspirin           | +         | +         | +         | +         | +         | +              | + |
| ARCADIA         | Apixaban            | Aspirin           | +         | +         | +         | +         | +         | +              | + |
| ATTICUS         | Apixaban            | Aspirin           | +         | +         | +         | +         | +         | +              | + |

  

|                                                                                     |               |                                            |  |
|-------------------------------------------------------------------------------------|---------------|--------------------------------------------|--|
|  | Low risk      |                                            |  |
|  | Some concerns |                                            |  |
|  | High risk     |                                            |  |
|                                                                                     | D1            | Randomisation process                      |  |
|                                                                                     | D2            | Deviations from the intended interventions |  |
|                                                                                     | D3            | Missing outcome data                       |  |
|                                                                                     | D4            | Measurement of the outcome                 |  |
|                                                                                     | D5            | Selection of the reported result           |  |

**eFigure 4. Association of DOAC compared to antiplatelet therapy with ISTH defined major haemorrhage**

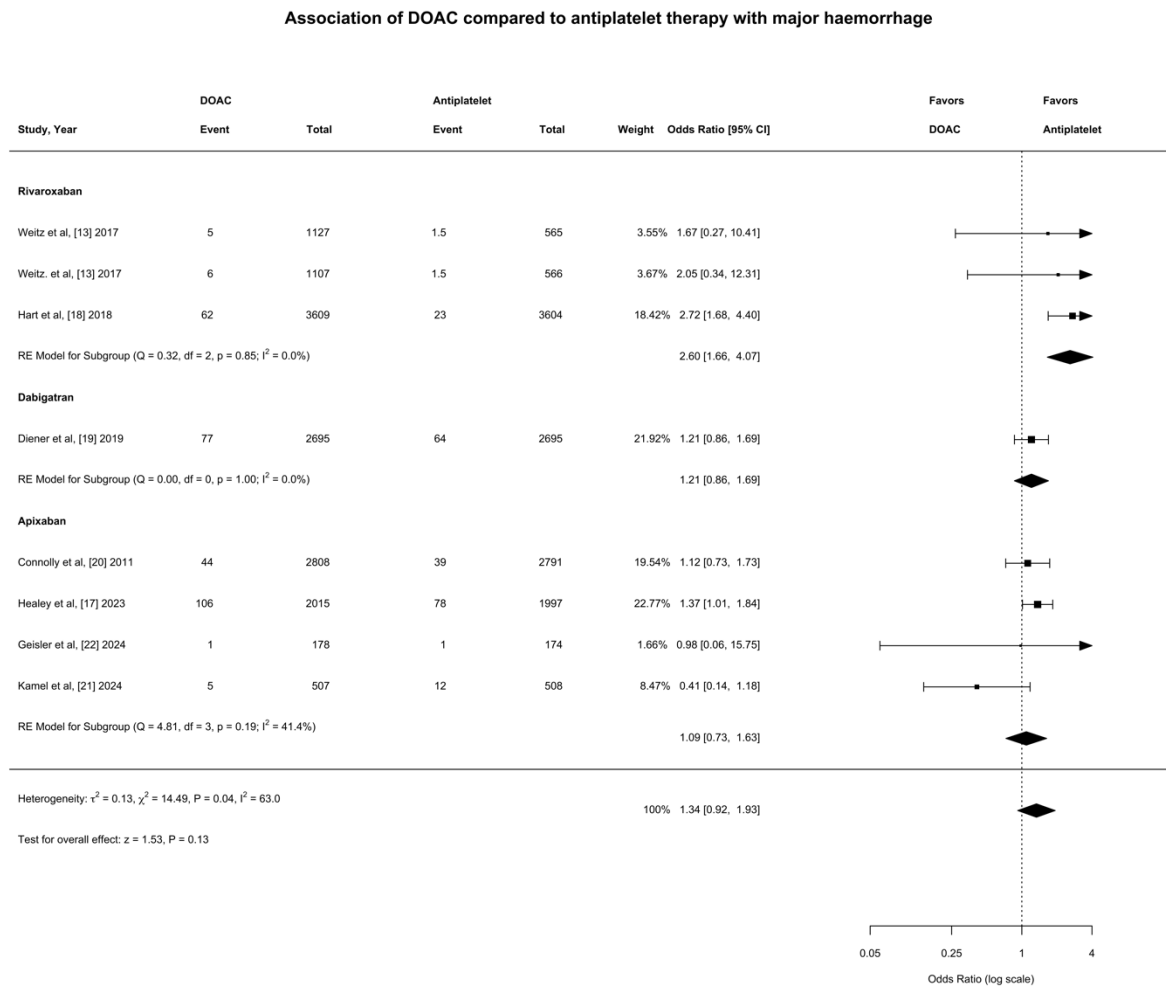

eFigure 4 – Forest plot demonstrating the association of direct oral anticoagulant therapy compared to antiplatelet therapy with major haemorrhage according to the ISTH definition for major haemorrhage. The squares and bars represent the mean values and 95% confidence intervals of the effect sizes, while the area of the squares reflects the weight of the studies. The combined effects appear as diamonds and the vertical dashed line represents the line of no effect.

DOAC- Direct oral anticoagulation, CI-Confidence Interval, ISTH-International Society on Thrombosis and Haemostasis.



**eFigure 5. Association of DOAC compared to antiplatelet therapy with GI haemorrhage**

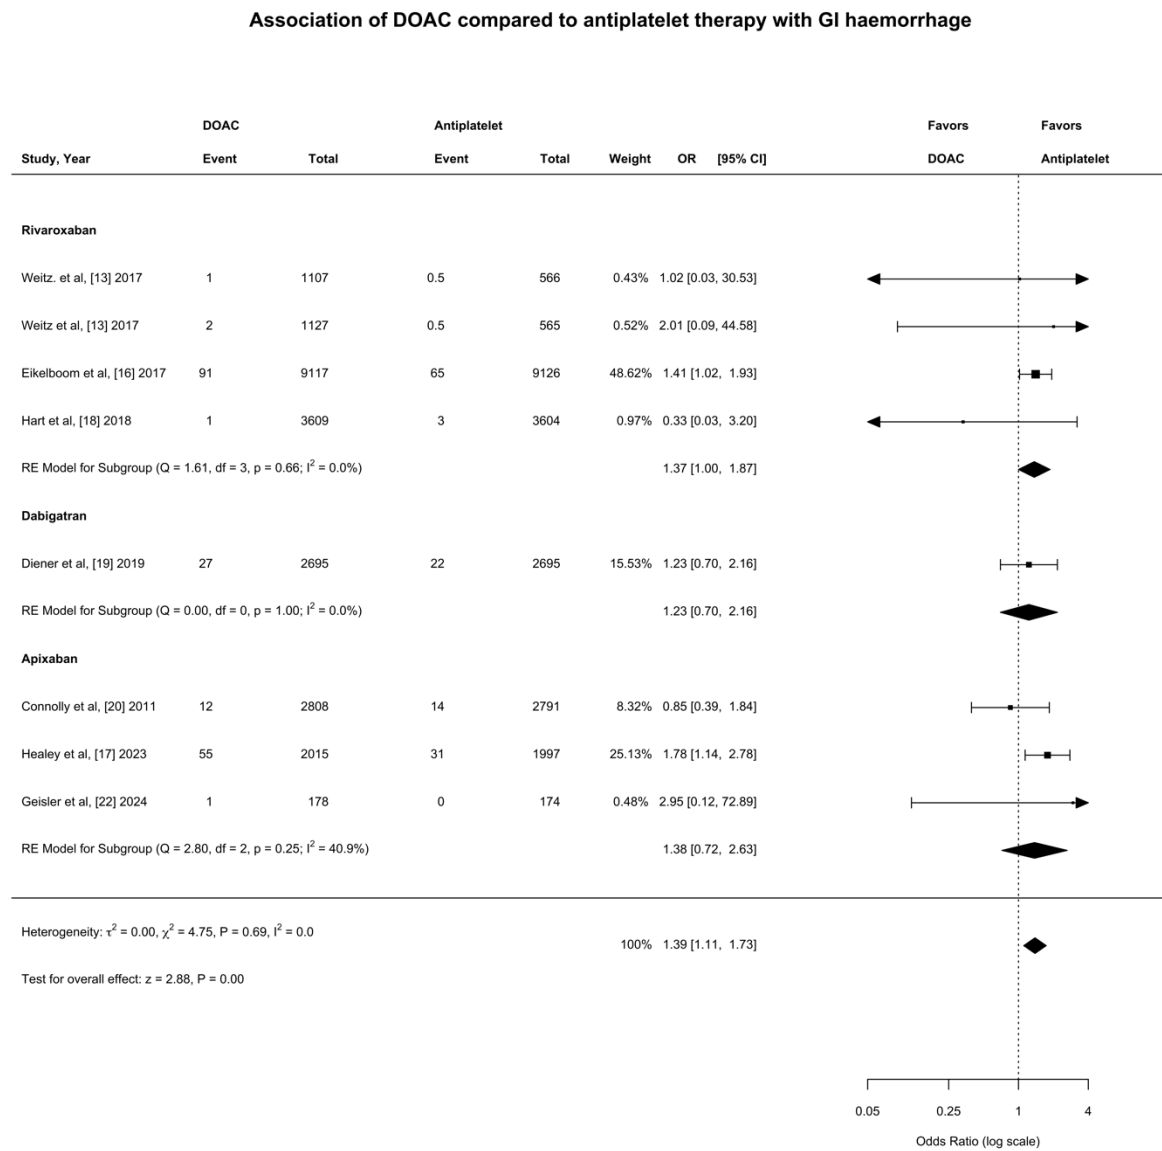

eFigure 5 – Forest plot demonstrating the association of direct oral anticoagulant therapy compared to antiplatelet therapy with GI haemorrhage events. The squares and bars represent the mean values and 95% confidence intervals of the effect sizes, while the area of the squares reflects the weight of the studies. The combined effects appear as diamonds and the vertical dashed line represents the line of no effect.

DOAC- Direct oral anticoagulation, CI-Confidence Interval, GI-gastrointestinal.

**eFigure 6. Association of DOAC compared to antiplatelet therapy with all haemorrhage**

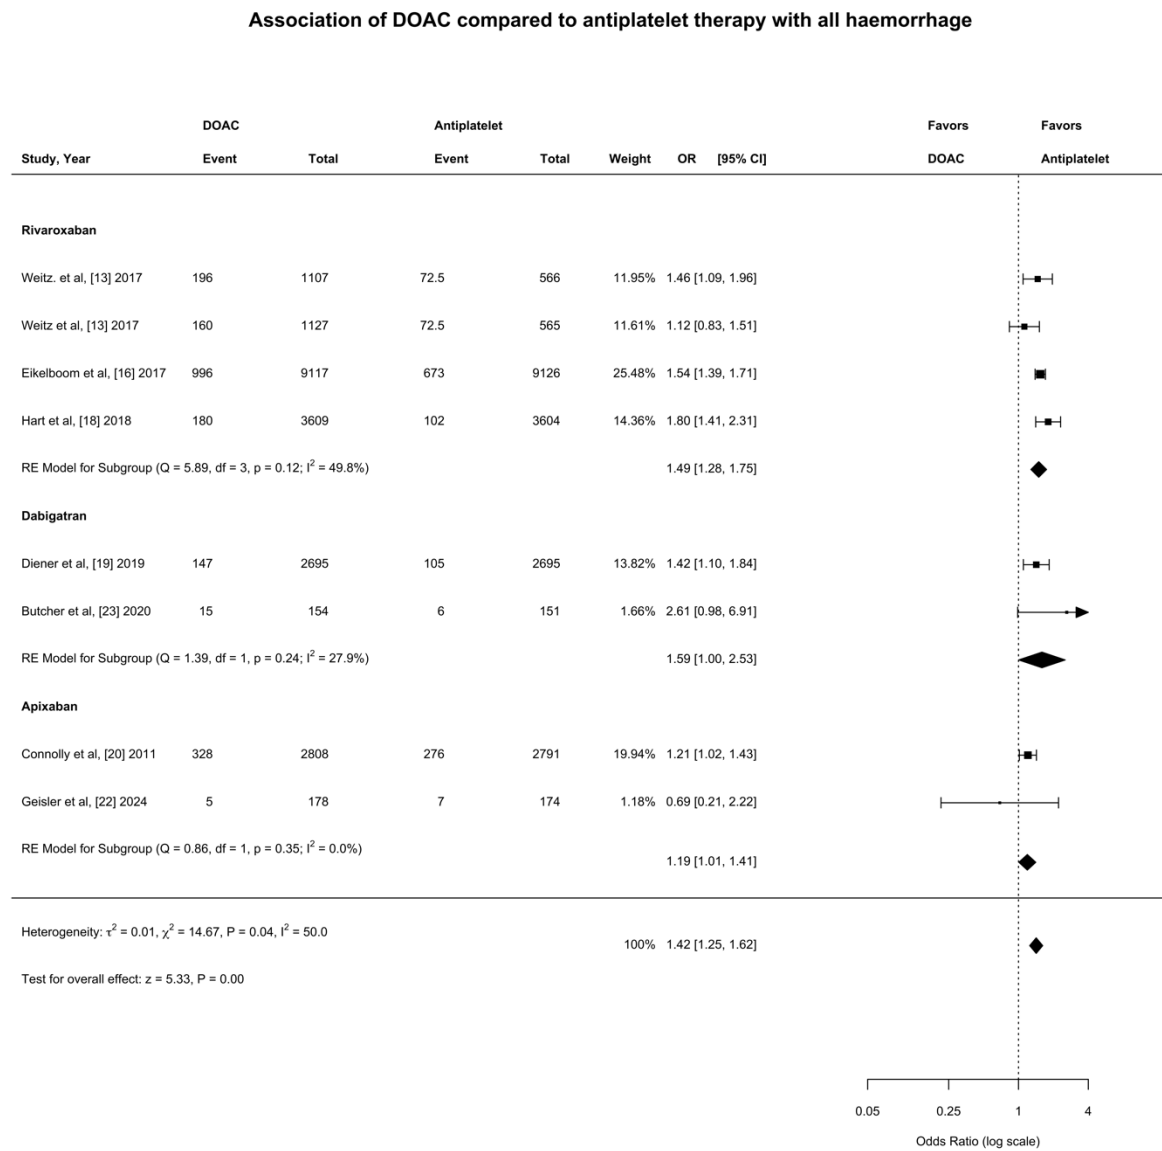

eFigure 6 – Forest plot demonstrating the association of direct oral anticoagulant therapy compared to antiplatelet therapy with all haemorrhage. The squares and bars represent the mean values and 95% confidence intervals of the effect sizes, while the area of the squares reflects the weight of the studies. The combined effects appear as diamonds and the vertical dashed line represents the line of no effect. DOAC-Direct oral anticoagulation, CI-Confidence Interval.

**eFigure 7. Association of DOAC compared to antiplatelet therapy with ischaemic stroke**

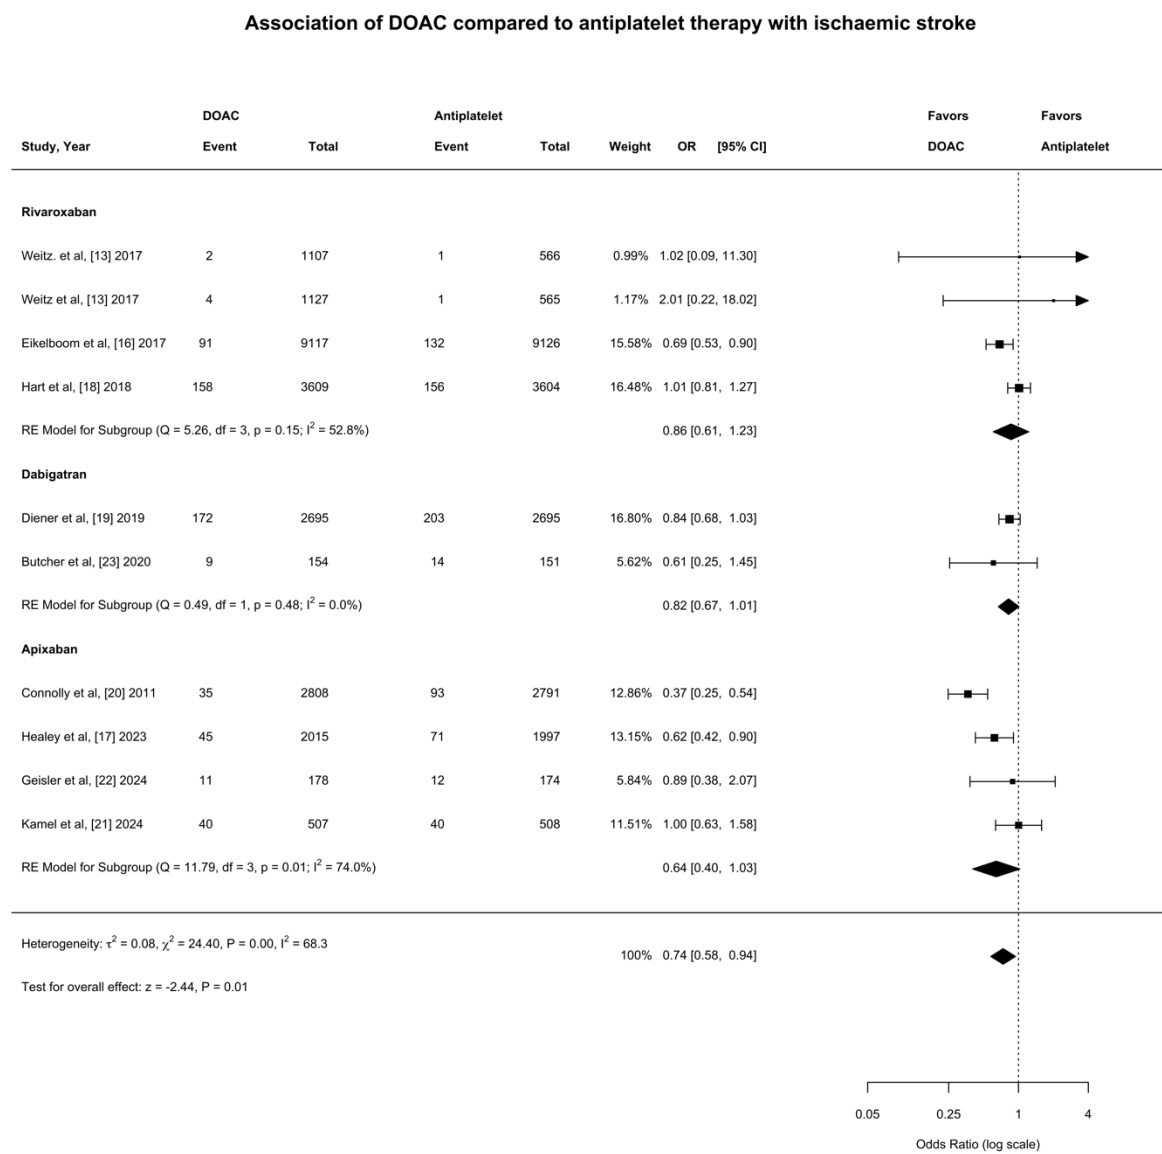

eFigure 7 – Forest plot demonstrating the association of direct oral anticoagulant therapy compared to antiplatelet therapy with ischaemic stroke. The squares and bars represent the mean values and 95% confidence intervals of the effect sizes, while the area of the squares reflects the weight of the studies. The combined effects appear as diamonds and the vertical dashed line represents the line of no effect. DOAC-Direct oral anticoagulation, CI-Confidence Interval.

**eFigure 8. Association of DOAC compared to antiplatelet therapy with CV death**

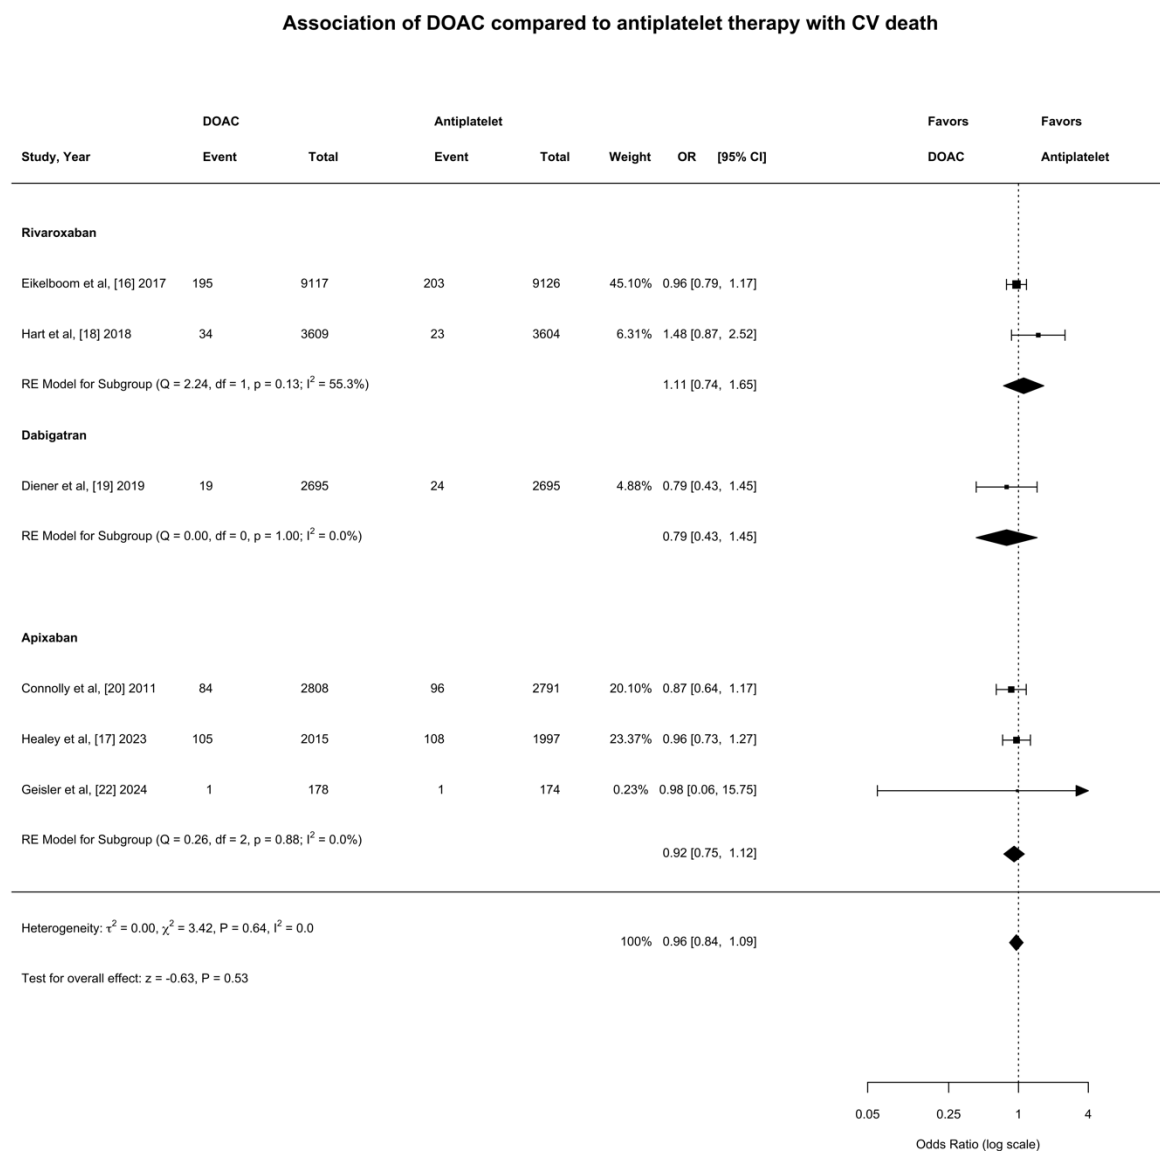

eFigure 8 – Forest plot demonstrating the association of direct oral anticoagulant therapy compared to antiplatelet therapy with cardiovascular death. The squares and bars represent the mean values and 95% confidence intervals of the effect sizes, while the area of the squares reflects the weight of the studies. The combined effects appear as diamonds and the vertical dashed line represents the line of no effect. DOAC-Direct oral anticoagulation, CI-Confidence Interval, CV-Cardiovascular death.

**eFigure 9. Association of DOAC compared to antiplatelet therapy with intracranial haemorrhage, sensitivity analysis excluding trials with zero events**

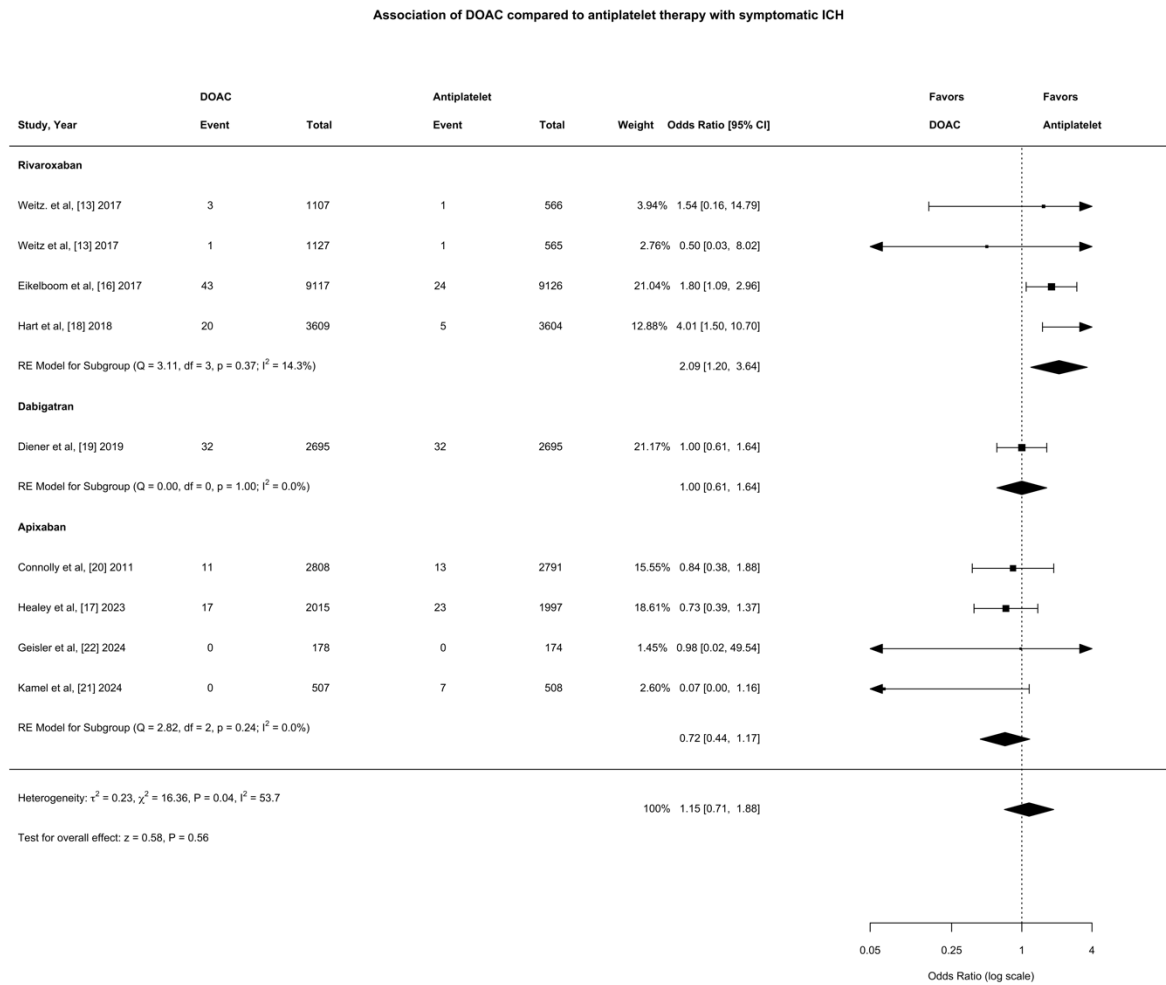

eFigure 9 – Forest plot demonstrating the association of direct oral anticoagulant therapy compared to antiplatelet therapy with symptomatic intracranial haemorrhage. The squares and bars represent the mean values and 95% confidence intervals of the effect sizes, while the area of the squares reflects the weight of the studies. The combined effects appear as diamonds and the vertical dashed line represents the line of no effect.

DOAC- Direct oral anticoagulation, CI-Confidence Interval.
