# Supplementary material for: Risk of Intracranial Hemorrhage Associated With Direct Oral Anticoagulation vs Antiplatelet Therapy: A Systematic Review and Meta-Analysis
Source: PubMed Central journal article supplement (PMC11618459; doi:10.1001/jamanetworkopen.2024.49017), 2024-12-04
Supplement: jamanetwopen-e2449017-s002.pdf [file jamanetwopen-e2449017-s002.pdf]

## Data Sharing Statement

Coyle. Risk of Intracranial Hemorrhage Associated With Direct Oral Anticoagulation vs Antiplatelet Therapy. *JAMA Netw Open*. Published December 04, 2024.  
doi:10.1001/jamanetworkopen.2024.49017

### Data

**Data available:** Yes

**Data types:** Other (please specify)

**Additional Information:** The data that support the findings of this study are available from the corresponding author upon reasonable request.

**How to access data:** The data that support the findings of this study are available from the corresponding author upon reasonable request.

**When available:** With publication

### Supporting Documents

**Document types:** None

### Additional Information

**Who can access the data:** Anyone requesting the data.

**Types of analyses:** For any purpose

**Mechanisms of data availability:** After approval of a proposal
